# Supplementary material
Source: PubMed Central journal article supplement (PMC8506229)
Supplement: jamacardiol-e212312-s001.pdf [file jamacardiol-e212312-s001.pdf]

## Supplementary Online Content

Demolder A, Timmermans F, Duytschaever M, Muiño-Mosquera L, De Backer J.  
Association of mitral annular disjunction with cardiovascular outcomes among patients  
with Marfan syndrome. *JAMA Cardiol*. Published online July 7, 2021.  
doi:10.1001/jamacardio.2021.2312

**eFigure.** Echocardiographic Examples of Mitral Annular Disjunction

**eTable 1.** Interobserver and Intraobserver Statistics

**eTable 2.** ECG Characteristics

**eTable 3.** Genotype Comparison

**eTable 4.** Clinical Characteristics of Patients With Sustained VT/SCD, Prior to the  
Arrhythmic Event

This supplementary material has been provided by the authors to give readers additional  
information about their work.

**eFigure.** Echocardiographic Examples of Mitral Annular Disjunction

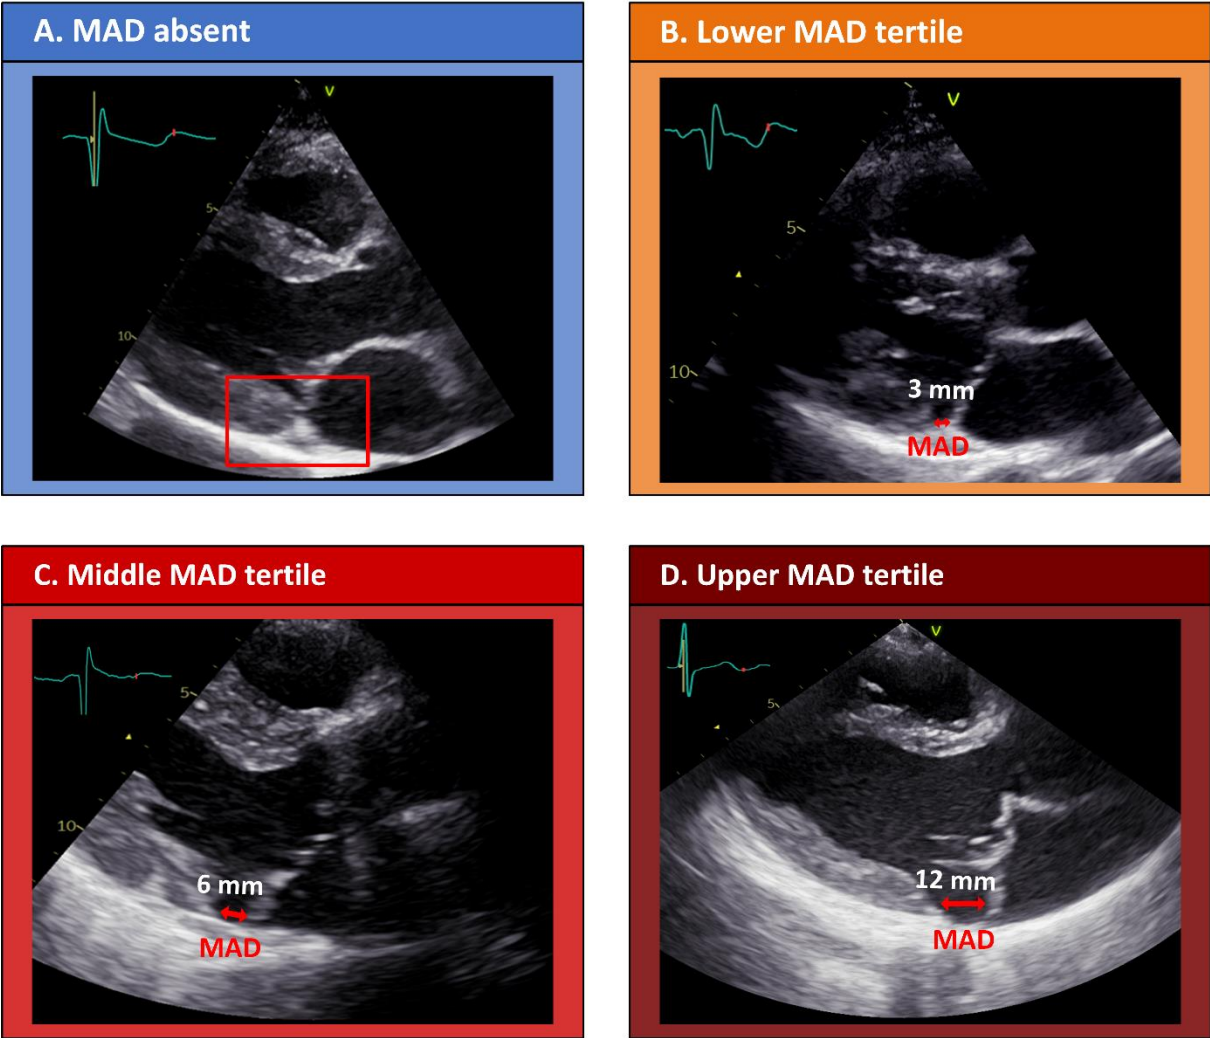

Abbreviation: MAD, mitral annular disjunction.

Figure legend: A, Echocardiographic example of a patient without MAD (red box). B, C and D, Echocardiographic images of patients with different severities of MAD indicated by the red arrows (lower, middle and upper tertiles of MAD distance).

**eTable 1.** Interobserver and Intraobserver Statistics

| Inter-observer statistics   |                          |          |                  |                                        |          |                  |
|-----------------------------|--------------------------|----------|------------------|----------------------------------------|----------|------------------|
|                             | MAD(-) vs. MAD(+)        | 95% CI   | P value          | MAD(+) $\leq$ 10mm vs. MAD(+) $>$ 10mm | 95% CI   | P value          |
| <b>Cohen's Kappa</b>        | 0.84                     | 0.63 – 1 | <b>&lt;0.001</b> | 0.90                                   | 0.71 – 1 | <b>&lt;0.001</b> |
| <b>ICC for MAD distance</b> | 0.89, 95% CI (0.75-0.96) |          |                  |                                        |          |                  |

  

| Intra-observer statistics   |                          |          |                  |                                        |          |                  |
|-----------------------------|--------------------------|----------|------------------|----------------------------------------|----------|------------------|
|                             | MAD(-) vs. MAD(+)        | 95% CI   | P value          | MAD(+) $\leq$ 10mm vs. MAD(+) $>$ 10mm | 95% CI   | P value          |
| <b>Cohen's Kappa</b>        | 0.92                     | 0.78 – 1 | <b>&lt;0.001</b> | 0.90                                   | 0.71 – 1 | <b>&lt;0.001</b> |
| <b>ICC for MAD distance</b> | 0.93, 95% CI (0.84-0.97) |          |                  |                                        |          |                  |

Abbreviations: ICC, intraclass correlation coefficient; MAD, mitral annular disjunction.

**eTable 2.** ECG Characteristics

| Characteristic   | Median (IQR)     |                 |                 | P value |
|------------------|------------------|-----------------|-----------------|---------|
|                  | Total<br>(n=142) | MAD -<br>(n=94) | MAD +<br>(n=48) |         |
| PR-interval, ms  | 154 (142-172)    | 155 (142-173)   | 153 (140-170)   | 0.432   |
| QRS-duration, ms | 94 (88-102)      | 94 (86-101)     | 96 (90-102)     | 0.284   |
| QT duration, ms  | 407 (382-429)    | 409 (384-430)   | 400 (382-428)   | 0.338   |
| QTc duration, ms | 420 (401-437)    | 419 (401-437)   | 423 (402-437)   | 0.449   |

Abbreviation: MAD, mitral annular disjunction.

**eTable 3.** Genotype Comparison

|                                      | Total<br>(n=142) | MAD(-)<br>(n=94) | MAD(+)<br>(n=48) | <i>P</i> value |
|--------------------------------------|------------------|------------------|------------------|----------------|
| Type of <i>FBN1</i> variant, No. (%) |                  |                  |                  |                |
| Missense                             | 73 (51)          | 49 (52)          | 24 (50)          | 0.810          |
| Nonsense                             | 29 (20)          | 20 (21)          | 9 (19)           | 0.724          |
| Frameshift                           | 26 (18)          | 15 (16)          | 11 (23)          | 0.310          |
| Splice-site                          | 11 (8)           | 7 (7)            | 4 (8)            | 1.000          |
| In-frame                             | 3 (2)            | 3 (3)            | 0 (0)            | 0.551          |
| Localization: exon 24-32, No. (%)    | 16 (11)          | 10 (11)          | 6 (13)           | 0.740          |
| Variant affecting cysteine, No. (%)  | 42 (30)          | 26 (28)          | 16 (33)          | 0.483          |
| Effect on the protein, No. (%)       |                  |                  |                  |                |
| Haploinsufficiency                   | 54 (38)          | 34 (36)          | 20 (42)          | 0.523          |

Abbreviation: MAD, mitral annular disjunction.

**eTable 4.** Clinical Characteristics of Patients With Sustained VT/SCD, Prior to the Arrhythmic Event

| Patient          | Age | SCD/<br>VT | EF,<br>% | MR      | AR      | Aortic<br>sinus,<br>mm | Aortic<br>root<br>Z-score | Aortic<br>surgery | Mitral<br>surgery | QTc,<br>ms | MVP | MAD<br>length,<br>mm |
|------------------|-----|------------|----------|---------|---------|------------------------|---------------------------|-------------------|-------------------|------------|-----|----------------------|
| 001              | 28  | SCD        | 65       | None    | Trivial | 38                     | 2.75                      | None              | None              | 436        | No  | 11                   |
| 002              | 11  | SCD        | 68       | Trivial | 1/4     | -                      | -                         | Yes               | None              | 437        | Yes | 11                   |
| 003              | 52  | VT         | 52       | 1/4     | None    | -                      | -                         | Yes               | None              | 462        | No  | 13                   |
| 004              | 30  | VT         | 47       | 1/4     | None    | -                      | -                         | Yes               | Yes               | 467        | Yes | 12                   |
| 005 <sup>a</sup> | 15  | VT         | 63       | 1/4     | 1/4     | -                      | -                         | Yes               | None              | 487        | Yes | 12                   |

<sup>a</sup>Received a heart transplantation later on due to development of progressive heart failure

Abbreviations: AR, aortic regurgitation; EF, ejection fraction; LVEDD, left ventricular end-diastolic diameter; MAD, mitral annular disjunction; MR, mitral regurgitation; MVP, mitral valve prolapse; SCD, sudden cardiac death; VT, sustained ventricular tachycardia.
